# Supplementary material
Source: publisher figshare collection journal article supplement (https://acs.figshare.com/ndownloader/files/21794901)
Supplement: Supplementary file 1 [file 21794901]

# **Mn(III) Chain Coordination Polymers assembled by Salicylidene–2–ethanolamine Schiff Base Ligands: Synthesis, Crystal Structures and HFEPR Study**

Oleh Stetsiuk<sup>a,c</sup>, Nataliya Plyuta<sup>a,c</sup>, Narcis Avarvari<sup>a</sup>, Evgeny Goreshnik<sup>b</sup>, Vladimir Kokozay<sup>c</sup>, Svitlana Petrusenko<sup>\*c</sup>, and Andrew Ozarowski<sup>\*d</sup>

*<sup>a</sup>MOLTECH-Anjou, UMR 6200, CNRS, UNIV Angers, 2 bd Lavoisier, 49045 ANGERS Cedex, France*

*<sup>b</sup>Department of Inorganic Chemistry and Technology, Jožef Stefan Institute, Jamova 39, 1000 Ljubljana, Slovenia*

*<sup>c</sup>Department of Inorganic Chemistry, Taras Shevchenko National University of Kyiv, Volodymyrska str. 64/13, Kyiv 01601, Ukraine. E-mail: spetrusenko@yahoo.com*

*<sup>d</sup>National High Magnetic Field Laboratory, Florida State University, 1800 E. Paul Dirac Drive, Tallahassee, Florida 32310, USA. E-mail: ozarowsk@magnet.fsu.edu; Fax: +1 850–644–1366*

## **Supplementary information**

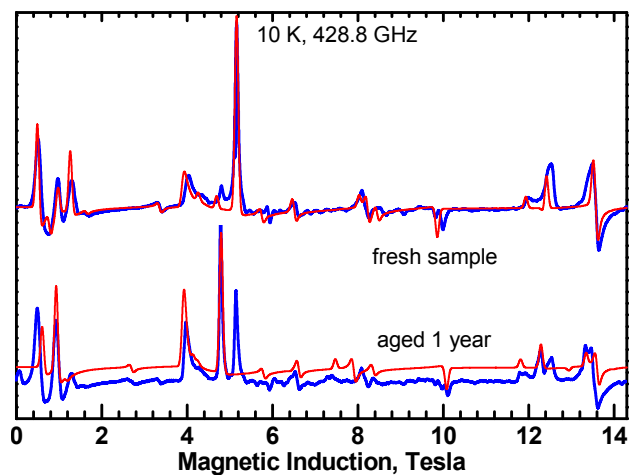

**Figure S1.** EPR spectra of **1**. Blue: experimental; red: simulated. The spin Hamiltonian parameters of the fresh sample are given in Table 4 (main text). The spectrum of an aged sample was simulated using  $g_x = 1.976$ ,  $g_y = 1.976$ ,  $g_z = 2.002$ ,  $D = -3.37 \text{ cm}^{-1}$ ,  $E = -0.68 \text{ cm}^{-1}$ ,  $B_4^0 = -0.00051 \text{ cm}^{-1}$ ,  $B_4^4 = -0.0073 \text{ cm}^{-1}$ .

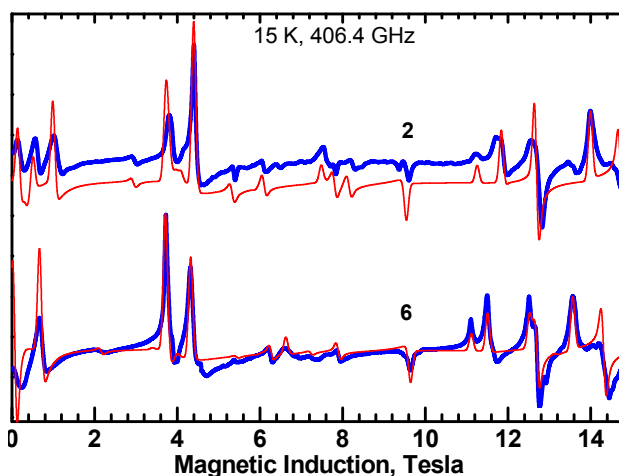

**Figure S2.** EPR spectra of the  $\text{Br}^-$  – containing complexes **2** (L1) and **6** (L2). Blue: experimental; red: simulated. The spin Hamiltonian parameters are given in Table 4 (main text).

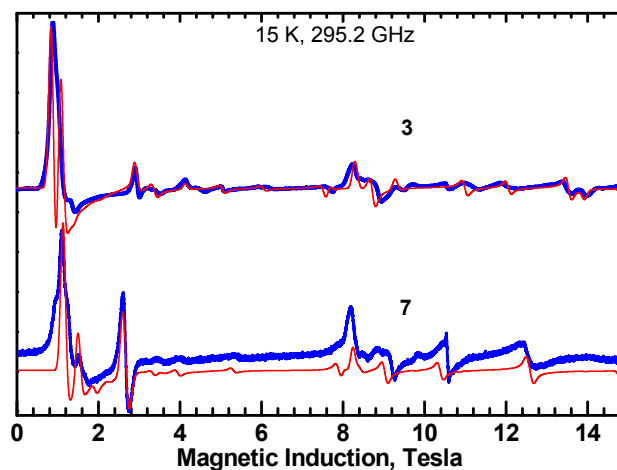

**Figure S3.** EPR spectra of the  $\text{I}^-$ -containing complexes **3** (L1) and **7** (L2). Blue: experimental; red: simulated. The spin Hamiltonian parameters are given in Table 4 (main text).

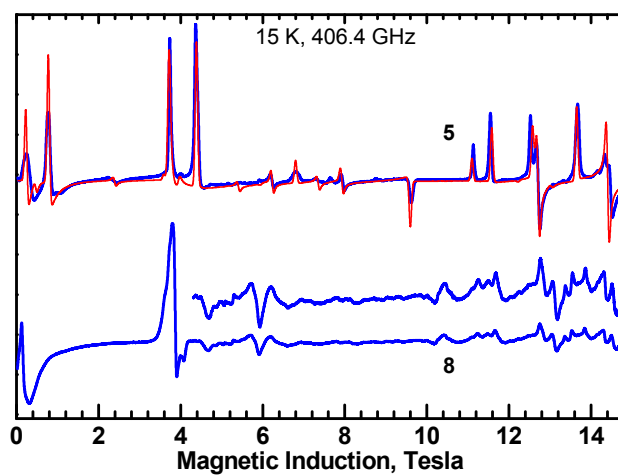

**Figure S4.** Comparison of the EPR spectra of the well-behaved complex **5** to ill-behaved **8**. Blue: experimental; red: simulated. The spin Hamiltonian parameters are given in Table 4 (main text). The additional splittings seen in **8** are most likely due to the metal-metal interactions.

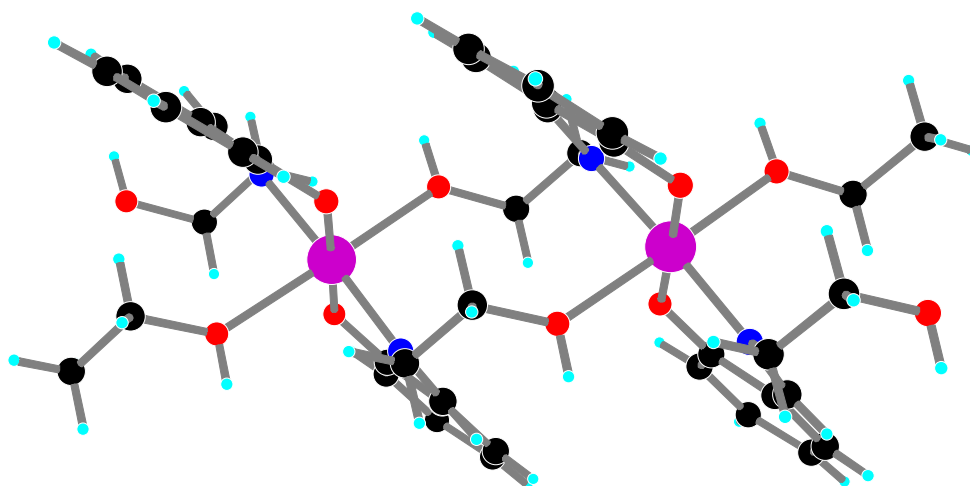

**Figure S5.** The arrangement of Mn moieties in **4** used to calculate the exchange integral  $J$  in the polymer chain.  $J = 0.02 \text{ cm}^{-1}$  (antiferromagnetic, for  $H = JS_1S_2$ ) was obtained. The moieties are related by the symmetry operation  $x+1, y, z$  (a translation).

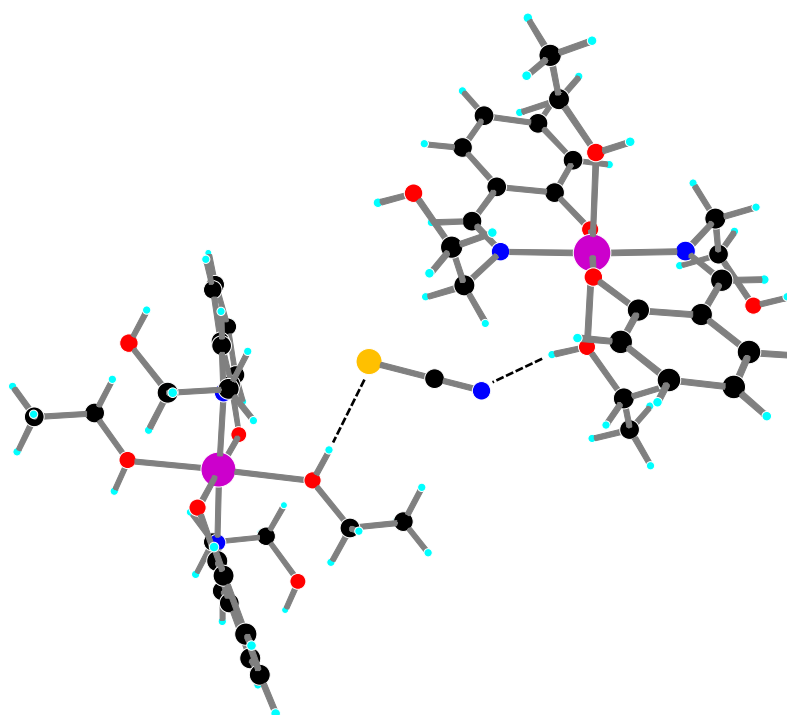

**Figure S6.** The arrangement of Mn moieties in **4**, used to calculate the exchange integral  $J$  due to the hydrogen bonds.  $J = 0.02 \text{ cm}^{-1}$  (antiferromagnetic) was obtained. The moieties are related by the symmetry operation  $-x+3/2, -y+1, z-1/2$  (a 2-fold axis) and they belong to different chains.

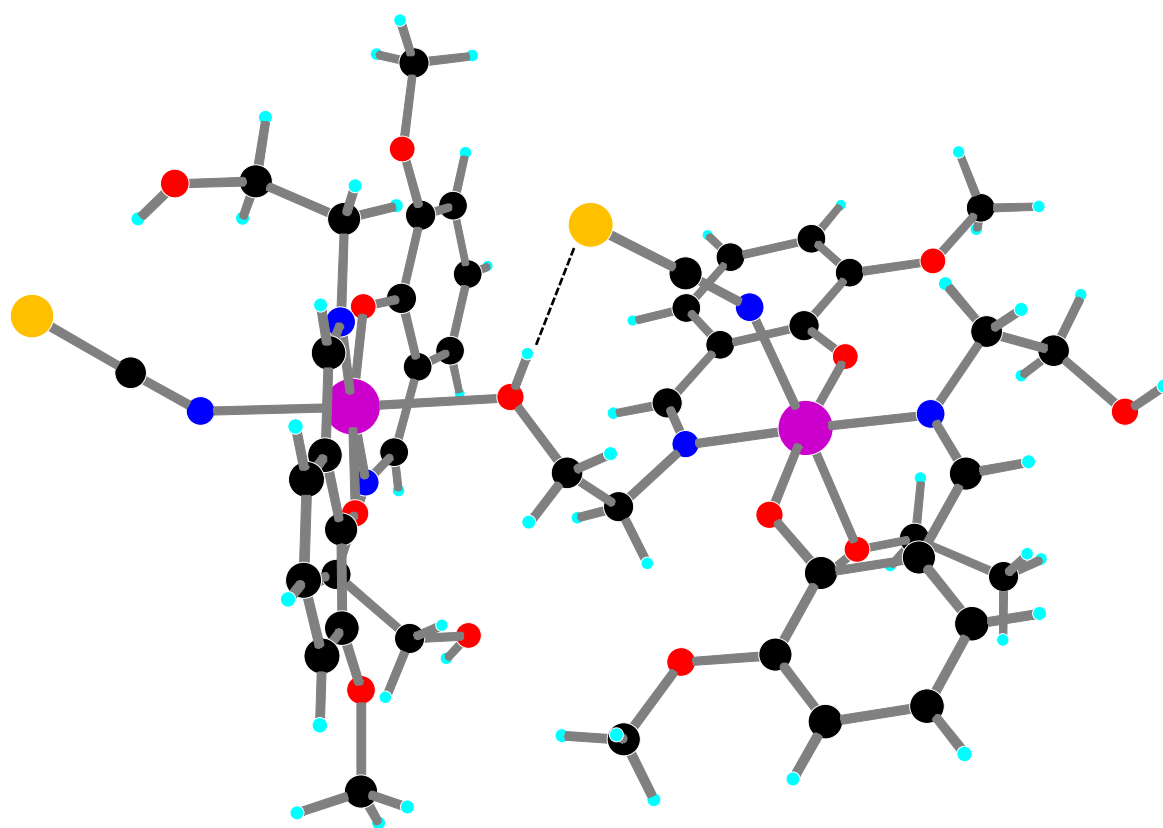

**Figure S7.** The arrangement of Mn moieties in **8** used to calculate the exchange integral  $J$  in the polymer chain.  $J = 0.04 \text{ cm}^{-1}$  (antiferromagnetic) was obtained. Note that the Mn moieties in the polymer chain of **8** are not parallel to each other, opposite to all other complexes. The two moieties are related by the symmetry operation  $-x+3/2, y-1/2, -z+3/2$ , (a 2-fold axis).
